# Supplementary material for: Pathophysiologic and Transcriptomic Analyses of Viscerotropic Yellow Fever in a Rhesus Macaque Model
Source: PLoS Negl Trop Dis. 2014 Nov 20;8(11):e3295. doi: 10.1371/journal.pntd.0003295 (PMC4238990; doi:10.1371/journal.pntd.0003295)
Supplement: Table S1 — Summary of functional enrichment categories for differentially expressed genes. GO = gene ontology; 17d = 17D vaccine; yfv = YFV-DakH1279; ES = enrichment score; category = functional category. (XLSX) [file pntd.0003295.s003.xlsx]

## Sheet: Sheet1
GO terms	signature	ES	category
defense response	17d	4.2	cytokine
methylation	17d	1.7	epigenetics
methyltransferase activity	17d	1.6	epigenetics
actin binding	17d	2.3	cytoskeleton
cytoskeleton organization	17d	2.1	cytoskeleton
sialyltransferase activity	17d	1.5	other
sequestering of actin monomers	17d	2.1	cytoskeleton
carboxypeptidase activity	17d	1.4	other
one-carbon metabolic process	17d	1.4	other
carbonate dehydratase activity	17d	1.7	other
cellular protein modification process	17d	2.1	ubiquitination_ISGylation
acid-amino acid ligase activity	17d	2	other
G-protein coupled purinergic nucleotide receptor signaling pathway	17d	3.5	Signal_transduction
G-protein coupled purinergic nucleotide receptor activity	17d	3.5	Signal_transduction
histone methyltransferase activity	17d	1.8	epigenetics
negative regulation of T cell proliferation	17d	1.4	cytokine
positive regulation of MAP kinase activity	17d	2.7	Signal_transduction
positive regulation of peptidyl-threonine phosphorylation	17d	1.6	Signal_transduction
positive regulation of phosphorylation	17d	1.6	Signal_transduction
mammary gland alveolus development	17d	1.6	other
ERK1 and ERK2 cascade	17d	1.6	Signal_transduction
histone methylation	17d	1.4	epigenetics
oligodendrocyte development	17d	1.5	other
morphogenesis of an epithelium	17d	1.6	other
positive regulation of DNA binding	17d	1.6	other
STAT protein import into nucleus	17d	2.1	Signal_transduction
ISG15-protein conjugation	17d	2	ubiquitination_ISGylation
defense response to Gram-negative bacterium	17d	3.2	cytokine
defense response to Gram-positive bacterium	17d	2.8	cytokine
protein methylation	17d	1.5	other
Cul3-RING ubiquitin ligase complex	17d	1.5	ubiquitination_ISGylation
metallocarboxypeptidase activity	17d	1.3	Signal_transduction
ammonium transport	17d	1.9	other
ammonium transmembrane transporter activity	17d	2.1	other
activation of MAPKK activity	17d	1.4	Signal_transduction
lamellipodium assembly	17d	1.4	cytoskeleton
peptidyl-arginine methylation, to asymmetrical-dimethyl arginine	17d	2.2	Signal_transduction
protein methyltransferase activity	17d	1.8	other
protein-arginine omega-N asymmetric methyltransferase activity	17d	2.2	other
protein-arginine omega-N monomethyltransferase activity	17d	2.2	other
defense response to bacterium	17d	3.9	cytokine
cGMP binding	17d	1.8	other
positive regulation of oocyte development	17d	2.1	other
epidermal growth factor receptor binding	17d	1.5	Signal_transduction
cytidylate kinase activity	17d	2.2	other
cGMP metabolic process	17d	2	Signal_transduction
carbon dioxide transport	17d	4.3	other
regulation of calcium ion import	17d	2	other
histone H4-R3 methylation	17d	2.1	epigenetics
histone methyltransferase activity (H4-R3 specific)	17d	2.3	epigenetics
purine ribonucleoside monophosphate biosynthetic process	17d	1.8	other
deaminase activity	17d	1.8	other
ankyrin binding	17d	1.6	cytoskeleton
negative regulation of secretion	17d	2.1	other
positive regulation of catenin import into nucleus	17d	1.8	other
regulation of protein localization to cell surface	17d	2.1	cytoskeleton
defense response to fungus	17d	5.8	cytokine
regulation of peptidyl-tyrosine phosphorylation	17d	1.5	Signal_transduction
ammonia transmembrane transporter activity	17d	2	other
ammonium transmembrane transport	17d	2.2	other
cellular response to interferon-alpha	17d	1.8	cytokine
ISG15 ligase activity	17d	2.1	cytokine
relaxation of cardiac muscle	17d	2.1	cytoskeleton
positive regulation of mitosis	17d	1.6	other
regulation of defense response to virus	17d	2	cytokine
epidermal growth factor receptor signaling pathway	17d	1.6	Signal_transduction
killing of cells of other organism	17d	7.1	cytokine
positive regulation of hyaluronan biosynthetic process	17d	2	other
negative regulation of cholesterol efflux	17d	2.2	other
positive regulation of cardiac muscle hypertrophy	17d	2	other
positive regulation of protein ubiquitination involved in ubiquitin-dependent protein catabolic process	17d	1.7	ubiquitination_ISGylation
positive regulation of cerebellar granule cell precursor proliferation	17d	2.3	other
negative regulation of cardiac muscle contraction	17d	2.2	cytoskeleton
cellular ion homeostasis	17d	2.3	other
regulation of transcription, DNA-dependent	yfv	4	transcription
mRNA processing	yfv	3	mRNA processing
semicircular canal morphogenesis	yfv	3	other
manganese ion binding	yfv	2.9	metal ion binding
nucleic acid binding	yfv	2.8	transcription
protein methylation	yfv	2.7	other
zinc ion binding	yfv	2.6	metal ion binding
E-box binding	yfv	2.6	transcription
positive regulation of translation	yfv	2.6	translation
protein methyltransferase activity	yfv	2.6	other
negative regulation of autophagy	yfv	2.4	autophagy
dopaminergic neuron differentiation	yfv	2.4	other
positive regulation of Golgi to plasma membrane protein transport	yfv	2.4	other
negative regulation of RNA splicing	yfv	2.3	mRNA processing
negative regulation of calcium ion import	yfv	2.3	other
post-embryonic organ morphogenesis	yfv	2.3	other
cytoplasmic transport	yfv	2.3	other
positive regulation of transcription from RNA polymerase II promoter	yfv	2.2	transcription
DNA-directed RNA polymerase II, holoenzyme	yfv	2.2	transcription
mammary gland alveolus development	yfv	2.2	other
hippocampus development	yfv	2.2	other
positive regulation of vascular endothelial growth factor receptor signaling pathway	yfv	2.2	other
spleen development	yfv	2.1	other
oxidoreductase activity, acting on paired donors, with incorporation or reduction of molecular oxygen, 2-oxoglutarate as one donor, and incorporation of one atom each of oxygen into both donors	yfv	2.1	other
transferase activity, transferring alkyl or aryl (other than methyl) groups	yfv	2.1	other
positive regulation of neuron differentiation	yfv	2	other
positive regulation of transcription from RNA polymerase II promoter in response to hypoxia	yfv	2	transcription
positive regulation of peptidyl-tyrosine autophosphorylation	yfv	2	other
vascular endothelial growth factor receptor 2 binding	yfv	2	other
magnesium ion binding	yfv	1.9	metal ion binding
dephosphorylation of RNA polymerase II C-terminal domain	yfv	1.9	transcription
protein dimerization activity	yfv	1.9	other
positive regulation of cell adhesion	yfv	1.9	cytoskeleton
negative regulation of growth	yfv	1.9	cell growth
negative regulation of insulin receptor signaling pathway	yfv	1.9	metabolism
response to unfolded protein	yfv	1.9	other
mammary gland branching involved in thelarche	yfv	1.9	other
positive regulation of fever generation	yfv	1.9	cytokine
Notch binding	yfv	1.9	other
metal ion binding	yfv	1.8	metal ion binding
response to osmotic stress	yfv	1.8	other
cerebellum development	yfv	1.8	other
neural crest cell differentiation	yfv	1.8	other
ER overload response	yfv	1.8	other
positive regulation of cardiac muscle cell differentiation	yfv	1.8	other
positive regulation of intracellular protein kinase cascade	yfv	1.8	other
transcription, DNA-dependent	yfv	1.7	transcription
RNA polymerase II core promoter proximal region sequence-specific DNA binding transcription factor activity involved in positive regulation of transcription	yfv	1.7	transcription
response to UV-B	yfv	1.7	other
tumor necrosis factor receptor binding	yfv	1.7	cytokine
positive regulation of Notch signaling pathway	yfv	1.7	other
cell division	yfv	1.7	cell growth
autophagic vacuole assembly	yfv	1.7	autophagy
circadian regulation of gene expression	yfv	1.7	other
macrophage differentiation	yfv	1.7	cytokine
microtubule cytoskeleton	yfv	1.6	cytoskeleton
motile cilium	yfv	1.6	cytoskeleton
condensed chromosome kinetochore	yfv	1.6	cell growth
positive regulation of transcription, DNA-dependent	yfv	1.6	transcription
double-stranded DNA binding	yfv	1.6	transcription
positive regulation of cell division	yfv	1.6	cell growth
bile acid metabolic process	yfv	1.6	metabolism
negative regulation of neuron apoptotic process	yfv	1.6	apoptosis
response to stress	yfv	1.6	cytokine
endoplasmic reticulum unfolded protein response	yfv	1.6	other
negative regulation of mRNA splicing, via spliceosome	yfv	1.6	mRNA processing
blood circulation	yfv	1.6	other
male germ cell nucleus	yfv	1.6	other
morphogenesis of an epithelial sheet	yfv	1.6	other
eating behavior	yfv	1.6	other
DNA binding	yfv	1.5	transcription
response to light stimulus	yfv	1.5	other
response to lipopolysaccharide	yfv	1.5	cytokine
negative regulation of sequence-specific DNA binding transcription factor activity	yfv	1.5	transcription
fibroblast growth factor receptor signaling pathway	yfv	1.5	cell growth
auditory receptor cell differentiation	yfv	1.5	other
protein-lysine N-methyltransferase activity	yfv	1.5	other
tube formation	yfv	1.5	other
positive regulation of cell cycle	yfv	1.5	cell growth
cellular protein metabolic process	yfv	1.5	metabolism
JAK-STAT cascade	yfv	1.5	cell growth
snoRNA binding	yfv	1.5	other
germinal center formation	yfv	1.5	other
receptor agonist activity	yfv	1.5	other
cytokine activity	yfv	1.4	cytokine
negative regulation of apoptotic process	yfv	1.4	apoptosis
cholesterol transport	yfv	1.4	metabolism
protein kinase binding	yfv	1.4	other
large ribosomal subunit	yfv	1.4	translation
positive regulation of NF-kappaB transcription factor activity	yfv	1.4	cytokine
MAP kinase tyrosine/serine/threonine phosphatase activity	yfv	1.4	cytokine
transcription from RNA polymerase II promoter	yfv	1.4	transcription
neuronal stem cell maintenance	yfv	1.4	other
RNA polymerase II core promoter sequence-specific DNA binding transcription factor activity	yfv	1.4	transcription
protein binding transcription factor activity	yfv	1.4	transcription
positive regulation of receptor internalization	yfv	1.4	other
response to radiation	yfv	1.4	other
regulation of mitotic cell cycle	yfv	1.4	cell growth
positive regulation of interleukin-2 biosynthetic process	yfv	1.4	cytokine
cell migration involved in sprouting angiogenesis	yfv	1.4	other
microtubule anchoring	yfv	1.4	cytoskeleton
embryonic morphogenesis	yfv	1.4	other
regulation of DNA-dependent transcription, elongation	yfv	1.3	transcription
enzyme binding	yfv	1.3	other
mRNA splice site selection	yfv	1.3	mRNA processing
RNA polymerase II core promoter proximal region sequence-specific DNA binding	yfv	1.3	transcription
angiogenesis	yfv	1.3	other
intracellular receptor mediated signaling pathway	yfv	1.3	other
